# Supplementary material for: Template-free synthesis of Mn2+ doped hierarchical CuS yolk–shell microspheres for photocatalytic reduction of Cr(vi)
Source: Royal Society of Chemistry journal article supplement (doi:10.1039/d1ce01730f), 2022-01-01
Supplement: d1ce01730f1.pdf [file d1ce01730f1.pdf]

## Support information

### Template-free synthesis of Mn<sup>2+</sup> doped hierarchical CuS yolk-shell microspheres for photocatalytic reduction of Cr(VI)

Yanmin Sun<sup>a,#</sup>, Rui Tan<sup>b,c#</sup>, Zhouzheng Jin<sup>b</sup>, Xiaoyun Li<sup>a</sup>, Qi Cai<sup>a</sup>, Jun Nan<sup>a</sup>,  
Dan Liu<sup>d\*</sup>, Haibin Yu<sup>a\*</sup>, Jianzhou Gui<sup>b\*</sup>

<sup>a</sup> CNOOC CenerTech Tianjin Chemical Research and Design Institute Co., Ltd., Tianjin 300131, China, E-mail: yuhb5@cnooc.com.cn (H. Yu)

<sup>b</sup> State Key Laboratory of Separation Membranes and Membrane Processes, Tianjin Key Laboratory of Green Chemical Technology and Process Engineering, School of Chemical Engineering and Technology, Tiangong University, Tianjin 300387, China E-mail: guijianzhou@tiangong.edu.cn (J. Gui)

<sup>c</sup> Sinopec-SK (Wuhan) Petrochemical Company Limited, Wuhan 430080, China.

<sup>d</sup> School of Chemistry, Tiangong University, Tianjin 300387, China, E-mail: [liudan@tiangong.edu.cn](mailto:liudan@tiangong.edu.cn) (D. Liu)

# The two authors contributed equally to this work.

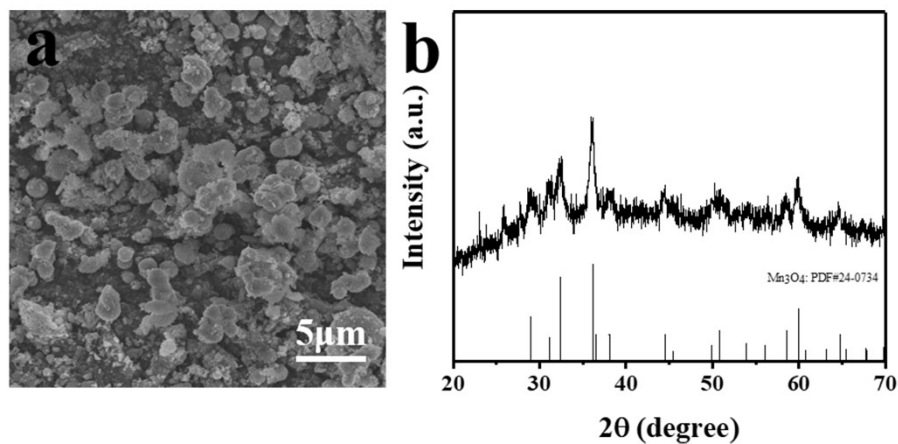

**Figure. S1.** (a)SEM image and (b)XRD pattern of product added manganese acetate and sulfur powder.

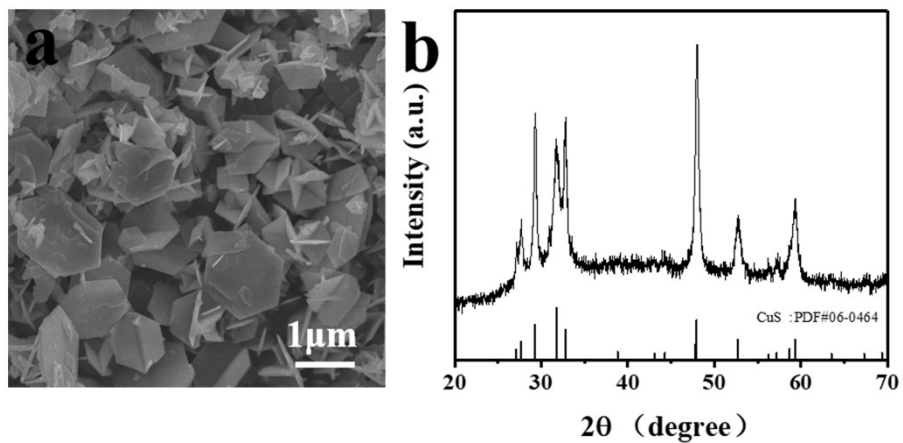

**Figure. S2** (a)SEM image and (b)XRD pattern of product obtained from acetic acid copper and sulfur powder.
